# Supplementary material for: Fabrication of photosensitive multilayered films vialayer-by-layer assembly with well controlled porous structure
Source: Royal Society of Chemistry journal article supplement (doi:10.1039/c1jm14289e), 2011-12-09
Supplement: c1jm14289e.pdf [file c1jm14289e.pdf]

## **Fabrication of photosensitive multilayered films *via* Layer-by-Layer assembly with well controlled porous structure**

Cao Li, Kang Wang, Yu-Hui Gong, Ze-Yong Li, Jing Zhang, Guo-Feng Luo, Ren-Xi  
Zhuo and Xian-Zheng Zhang\*

### **Fabrication of PLL (without APP)/DNA multilayered films**

Poly-L-lysine (PLL) was synthesized according to the method mentioned in the “Synthesis of 5-(4-Aminophenyl)-10,15,20-triphenyl-porphyrin (APP) Terminated Poly-L-lysine (APP-PLL)” section in the paper with APP replaced by 5.5 mg propargylamine (Shanghai Reagent Chemical Co. (PR China), purified before use) for the ring opening polymerization of 600 mg zLL-NCA.

PLL/DNA multilayered films were fabricated *via* Layer-by-Layer assembly, and the assembly processes employed the general alternate dipping method mentioned in the “Fabrication of APP-PLL/DNA Multilayered Films” section in the paper.

### **Light illumination of APP/DNA multilayered films**

PLL/DNA multilayered films with 16 layers were dipped in DI water and were irradiated by using a Xe lamp set up in a solar simulator (Newport, USA) with a light intensity of 300 mW/cm<sup>2</sup>, filtered by band-path filter of 400 nm for 180 min. And the films were then rinsed with plentiful DI water and dried under a stream of nitrogen before measurements.

### **Characterization of Multilayered Films**

Thickness of PLL/DNA multilayered films was determined using profilometry (Taylor–Hobson S4C-3D). The thickness of each sample was determined in five different locations on the substrate surface. The thickness of the films before and after light illumination was 70.2 nm and 66.7 nm, respectively.

The morphology of PLL/DNA multilayered films after light illumination was characterized by a SPM-9500J3 (Shimadzu, Japan) atomic force microscope (AFM)

operated in the tapping mode. And the AFM image is shown in Supplementary Fig. 1.

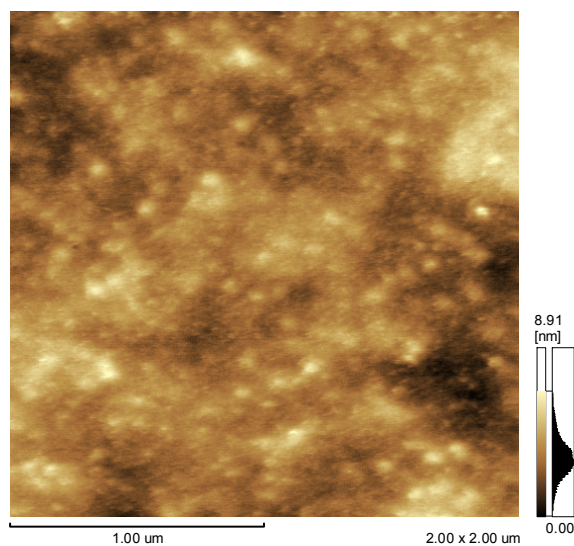

**Supplementary Fig. 1.** AFM image of PLL/DNA multilayered films with 16 layers after 180 min light illumination.

**The limit of the illumination effect on the APP-PLL/DNA multilayered films**

To know the limit of the illumination effect on the porous size and thickness, APP-PLL/DNA multilayered films with 16 layers were fabricated and were illuminated with Xe lamp until no absorbance of porphyrin at 425 nm appeared in the UV-Vis spectrum of the films. The peak at 425 nm in the spectrum disappeared in about 5-6 h. The thickness of the films was measured as 12.1 nm.
